# Supplementary material
Source: ML conference proceedings conference paper supplement (https://openaccess.thecvf.com/content/ICCV2025/html/Ramos_Processing_and_acquisition_ICCV_2025_paper.html)
Supplement: Supplementary file 1 [file Ramos_Processing_and_acquisition_ICCV_2025_supplemental.pdf]

# Processing and acquisition traces in visual encoders: What does CLIP know about your camera?

## Supplementary Material

### A. Impact of augmentations on encoding of metadata in CVLs

To verify our assumption that one of the main reasons that SSL models generally encode less metadata information is the use of heavy augmentations, we train a CVL model using OpenCLIP [2] both without heavy augmentation (default OpenCLIP setup) and with DINOv2 [5] style color augmentations.<sup>1</sup> We train a ViT-B/32 CVL model both from scratch and finetuned from the LAION-2B checkpoint on the YFCC15M dataset [6]. We follow the default training hyperparameters from OpenCLIP, which is training for 32 epochs with a batch size of  $32k$  using the AdamW [4] optimizer. We utilize the cosine scheduler with a warmup of 2,000 iterations. Learning rate is set to  $5e^{-4}$  and weight decay is equal to 0.2.

Fig. A and Fig. B present the results for processing-based and acquisition-based metadata label prediction, respectively. Augmentations greatly reduce the accuracy of processing-based metadata label prediction. We observe a similar trend for acquisition-based metadata labels, though not to the same extent and consistency.

Fig. C presents the results for the effects of processing on the downstream tasks. Augmentations greatly reduce the influence of processing parameters on the prediction of semantics.

Although these results point to the lack of heavy augmentations in CVLs as one of the main reasons for their strong encoding of metadata information, further investigation is still necessary, as some CVL models, like SigLIP [7], encode less metadata information, although they do not employ heavy augmentations.

### B. Parameters description

We consider the following processing and acquisition parameters.

- **JPEG compression** is one of the most common operations that will be applied to an image after its acquisition. JPEG applies lossy compression where the amount of compression can be controlled by the quality and chroma-subsampling parameters. To investigate the influence of JPEG compression on image representations, we recompress images using quality  $\in \{75, 85, 95\}$  and chroma-subsampling  $\in \{4:2:0, 4:4:4\}$ , which gives  $|\mathcal{P}| = 6$  possible processing parameter values.

<sup>1</sup>We use color jitter, random grayscaling, and random blurring.

- **Sharpening** corrects pixel values such that the image appears sharper, and is commonly automatically applied by different services [3]. We use unsharp mask based sharpening of an image  $\mathcal{I}$  given as  $\text{sharp}(\mathcal{I}) = \alpha\mathcal{I} + (1 - \alpha)\text{blur}(\mathcal{I})$  where  $\alpha$  controls the sharpness of the image.  $\alpha = 1$  gives the original image, while  $\alpha > 1$  gives a sharper image. For  $\mathcal{P}$  we consider a set of processing parameter values given when  $\alpha \in \{1, 2, 4\}$ .
- **Resizing** is a common operation applied to images, after their acquisition, that changes the dimension of the image. To evaluate the influence of resizing, we set processing parameter values as  $\mathcal{P} = \{1x, 0.5x, 2x\}$  that define original image, image where both width and height are halved, and image where both width and height are doubled, respectively. We use bilinear interpolation.
- **Interpolation** defines the interpolation function used during image resizing. To evaluate the influence of interpolation function, we set processing parameter values as  $\mathcal{P} = \{\text{bilinear}, \text{bicubic}, \text{lanczos}, \text{box}\}$ , and we resize each image by changing its both sides by  $r\%$  where  $r \sim \text{Uniform}[-20, 20]$ .<sup>2</sup>
- **Make** refers to the manufacturer of the camera, based on Exif metadata. Based on our setup, our analysis is based on nine manufacturers, namely *Apple*, *Canon*, *EASTMAN KODAK COMPANY*, *FUJIFILM*, *NIKON*, *OLYMPUS OPTICAL CO.,LTD*, *Panasonic*, *SONY*, and *Samsung*.
- **Model (all)** refers to the specific camera model used to capture the photo. We study 88 different camera models, shown in Tab. A.
- **Model (smart)** refers to the specific camera model used to capture the photo, but only among photos captured by smartphones. The 12 classes we study are also shown in Tab. A.
- **Model (smart vs non-smart)** is a binary parameter that indicates whether the camera used to shoot the photo was a smartphone. When analyzing this parameter, we use a subset of data that was curated to conveniently identify non-smartphones images and smartphone images. The former comprise all images taken with a camera manufactured by Canon, Nikon, Fujifilm, Panasonic, or Olympus; while the latter comprise all images taken with a smartphone manufactured by Apple, Google, Huawei, Xiaomi, or Motorola.
- **Exposure** refers to the amount of time that light was al-

<sup>2</sup>Note that the same value of  $r$  is applied per image across all different interpolations.

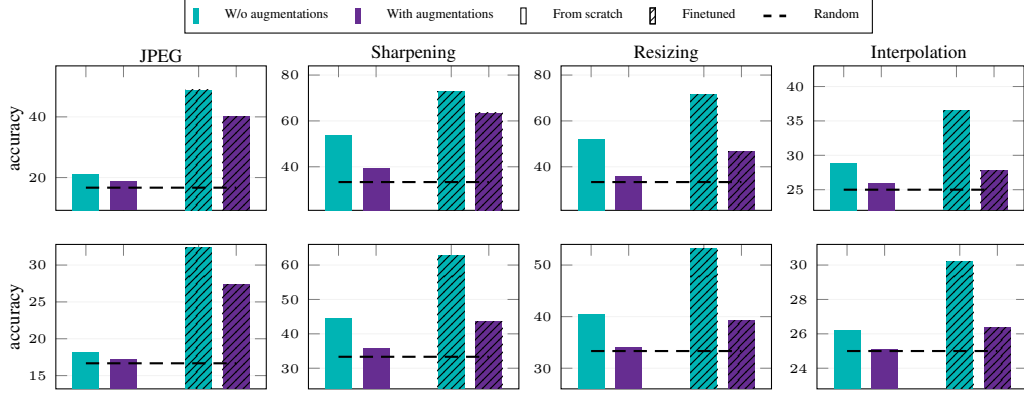

Figure A. **Image processing-based label prediction using a CVL model trained with and without augmentations.** Classification accuracy using a linear classifier on embeddings of frozen visual encoders on ImageNet (top) and iNaturalist (bottom) datasets. CVL model trained both from scratch and finetuned starting from a LAION-2B checkpoint.

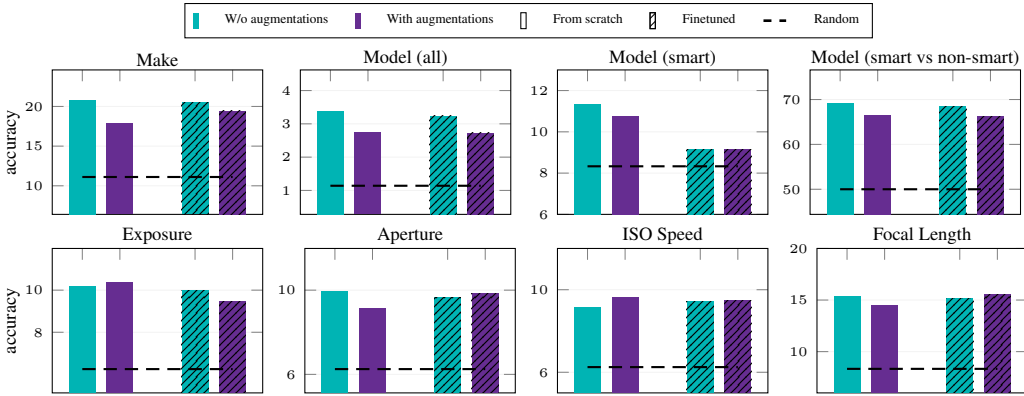

Figure B. **Image acquisition-based label prediction using a CVL model trained with and without augmentations.** Classification accuracy using a linear classifier on embeddings of frozen visual encoders with images masked at 90% on the FlickrExif dataset. CVL model trained both from scratch and finetuned starting from a LAION-2B checkpoint.

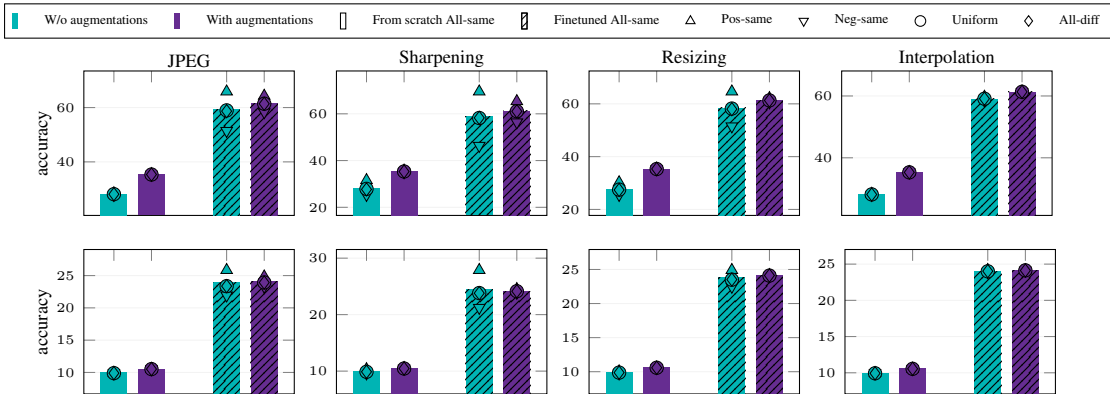

Figure C. **Impact of image processing parameters on semantics for a CVL model trained with and without augmentations.** Semantic label prediction accuracy on ImageNet (top) and iNaturalist (bottom) datasets in five different setups. *All-same (baseline)*: all training and test images share the same processing-based metadata label. *All-diff*: training images have the same metadata label, which is different than that of the test image. *Pos-same*: training images that are semantically positive to the test image have the same metadata label as the test image. *Neg-same*: training images that are semantically negative to the test image have the same metadata label as the test image. *Uniform*: the metadata labels are uniformly assigned to the training images. *Pos-same* and *neg-same* settings require an artificially created experiment where a different training set is used per test image. CVL model trained both from scratch and finetuned starting from a LAION-2B checkpoint. Shown for  $k = 10$  and  $k = 1$  for the kNN classifier for ImageNet and iNaturalist, respectively.

Table A. All 88 camera models studied when analyzing the acquisition attribute model (all). Names are presented as they were found in the Exif metadata. Underlined models refer to smartphones analyzed under the model (smart) parameter.

|                        |                                         |             |                          |
|------------------------|-----------------------------------------|-------------|--------------------------|
| CYBERSHOT              | Canon EOS DIGITAL REBEL                 | NIKON D3100 | NIKON D800               |
| Canon EOS 10D          | Canon EOS DIGITAL REBEL XT              | NIKON D3200 | NIKON D810               |
| Canon EOS 20D          | Canon EOS R                             | NIKON D40   | NIKON D850               |
| Canon EOS 300D DIGITAL | Canon EOS R5                            | NIKON D5    | NIKON D90                |
| Canon EOS 30D          | Canon EOS R6                            | NIKON D50   | NIKON Z 6                |
| Canon EOS 350D DIGITAL | Canon EOS REBEL T3i                     | NIKON D500  | NIKON Z 6.2              |
| Canon EOS 40D          | Canon EOS Rebel T6                      | NIKON D5000 | NIKON Z 9                |
| Canon EOS 450D         | Canon EOS-1D X                          | NIKON D5100 | X-T2                     |
| Canon EOS 50D          | Canon EOS-1D X Mark II                  | NIKON D5200 | X-T3                     |
| Canon EOS 5D           | E-M1MarkII                              | NIKON D5300 | X-T4                     |
| Canon EOS 5D Mark II   | E5700                                   | NIKON D5500 | <u>iPhone 11</u>         |
| Canon EOS 5D Mark III  | E990                                    | NIKON D5600 | <u>iPhone 11 Pro Max</u> |
| Canon EOS 5D Mark IV   | ILCE-6000                               | NIKON D600  | <u>iPhone 12 Pro</u>     |
| Canon EOS 600D         | ILCE-6400                               | NIKON D610  | <u>iPhone 12 Pro Max</u> |
| Canon EOS 60D          | ILCE-7                                  | NIKON D70   | <u>iPhone 13 Pro</u>     |
| Canon EOS 6D           | ILCE-7M3                                | NIKON D700  | <u>iPhone 6</u>          |
| Canon EOS 6D Mark II   | ILCE-7RM2                               | NIKON D7000 | <u>iPhone 6s</u>         |
| Canon EOS 70D          | ILCE-7RM3                               | NIKON D7100 | <u>iPhone 7</u>          |
| Canon EOS 7D           | Kodak CLAS Digital Film Scanner / HR200 | NIKON D7200 | <u>iPhone 7 Plus</u>     |
| Canon EOS 7D Mark II   | NIKON D100                              | NIKON D750  | <u>iPhone X</u>          |
| Canon EOS 80D          | NIKON D200                              | NIKON D7500 | <u>iPhone XR</u>         |
| Canon EOS 90D          | NIKON D300                              | NIKON D80   | <u>iPhone XS</u>         |

lowed to enter the camera while taking the photo. This is a rational number, which in our data ranges from 1/1,000 seconds to 1/30 seconds.

- **Aperture** refers to size of the opening in the lens and the corresponding amount of light thus allowed to enter the camera while taking the photo. This is measured in f-numbers, calculated as the ratio between the focal length and the diameter of the lens opening. In our experiments, these ratios range from 1.8 to 11.
- **ISO Speed** is a parameter that measures the camera sensor’s sensitivity to light, with higher values leading to higher sensitivity and lower values leading to lower sensitivity. In our data, these numbers range from 50 to 3200.
- **Focal Length** describes the distance between the center of the camera’s lens and the camera’s sensor. This is typically measured in mm. Our data covers focal lengths ranging from 4 mm to 200 mm.

## C. PairsCams dataset

Cameras used to collect the PairsCams dataset are shown in Table B with the number of images taken by each camera.

## D. Visual encoders

Our visual encoders are acquired from the following repositories: OpenAI,<sup>3</sup> OpenCLIP,<sup>4</sup> timm,<sup>5</sup> and FAIR.<sup>6</sup> We follow each encoder’s default preprocessing to extract image representations. This typically involves resizing images based on their smaller side, followed by center-cropping to the

<sup>3</sup><https://github.com/OPENAI>

<sup>4</sup>[https://github.com/mlfoundations/open\\_clip](https://github.com/mlfoundations/open_clip)

<sup>5</sup><https://github.com/huggingface/pytorch-image-models>

<sup>6</sup><https://github.com/facebookresearch/moco-v3>

Table B. Cameras used during data collection. Each object or scene is captured by two cameras, leading to a total of 1,460 photos from 730 pairs.

| model                      | type       | year | images |
|----------------------------|------------|------|--------|
| iPhone XR                  | smartphone | 2018 | 295    |
| Canon IXY 630              | compact    | 2014 | 285    |
| Pixel 4                    | smartphone | 2019 | 190    |
| iPhone SE (3rd generation) | smartphone | 2022 | 120    |
| Sony Cyber-shot DSC-WX300  | compact    | 2013 | 120    |
| Olympus C-8080 Wide Zoom   | compact    | 2004 | 100    |
| Casio Exilim EX-FH20       | compact    | 2008 | 100    |
| Canon EOS 450D             | DSLR       | 2008 | 80     |
| Xiaomi Poco X5 Pro         | smartphone | 2023 | 40     |
| iPhone 12                  | smartphone | 2020 | 26     |
| iPhone 14 Pro              | smartphone | 2022 | 25     |
| Olympus $\mu$ 700          | compact    | 2006 | 25     |
| Nothing Phone (2)          | smartphone | 2023 | 20     |
| iPhone 12 Pro              | smartphone | 2020 | 14     |
| Motorola Moto G XT1032     | smartphone | 2013 | 10     |
| Nikon Coolpix S200         | compact    | 2007 | 10     |
| total                      |            |      | 1,460  |

encoder’s input resolution, and normalization of the image tensor.

## E. Additional results on ImageNet-ES

An existing dataset that can be used for acquisition label prediction is ImageNet-ES [1], which contains ImageNet images that have been recaptured under varying acquisition settings, including ISO, shutter speed, aperture, and lighting conditions. Originally designed for out-of-distribution detection, the dataset features disjoint test and training labels. Thus, we randomly split the provided validation set into our own training and test sets using a 9:1 ratio. We follow the hyperparameter tuning and training protocol described in

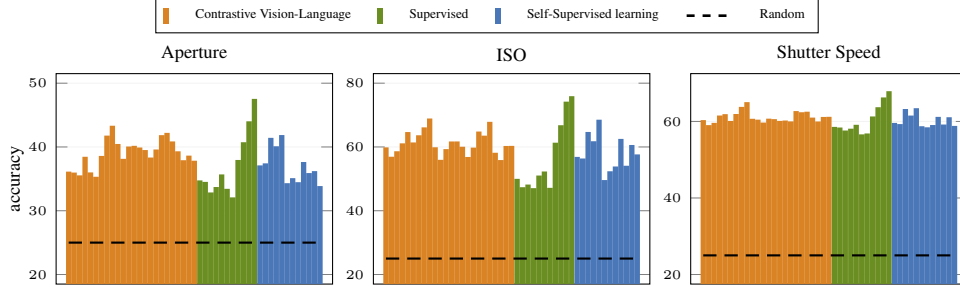

Figure D. **Image acquisition-based label prediction on ImageNet-ES.** Classification accuracy using a linear classifier on embeddings of frozen visual encoders with no masking. Ordering is according to Tab. C.

Sec. 3, using 12.5% of the training set for validation. Each image is annotated with metadata labels according to their aperture, ISO, and shutter speed labels, formulating a four-class classification task for each attribute.

Fig. D presents the performance of classifiers trained on frozen embeddings for the prediction of each attribute. Models across all categories achieve classification accuracy well above random chance. We attribute this to the broad range of values of the acquisition parameters used to create ImageNet-ES. For example, the ISO values of ImageNet-ES’s validation set ranges from 200 to 12,800, while the corresponding values in FlickrExif only range from 50 to 3,200. This wider range may result in more visually distinguishable cases compared to those in FlickrExif.

## F. Effect of masking

In this section, we assess the impact of the masking applied for the prediction of acquisition labels in Sec. 3.2. Fig. E and Fig. F show the classification accuracy on FlickrExif with 0% and 75% masking, respectively. Comparing the two figures with Fig. 6, we observe that retaining semantic information in the input images makes it easier to identify acquisition labels, leading to higher classification accuracy. This suggests potential correlations between acquisition labels and semantic content, which can be exploited by the models to achieve a better performance.

## References

- [1] Eunsu Baek, Keondo Park, Jiyeon Kim, and Hyung-Sin Kim. Unexplored faces of robustness and out-of-distribution: Covariate shifts in environment and sensor domains. In *CVPR*, 2024. 3
- [2] Mehdi Cherti, Romain Beaumont, Ross Wightman, Mitchell Wortsman, Gabriel Ilharco, Cade Gordon, Christoph Schuhmann, Ludwig Schmidt, and Jenia Jitsev. Reproducible scaling laws for contrastive language-image learning. In *CVPR*, 2023. 1
- [3] Flickr. Real-time resizing of flickr images using gpus. [https://code.flickr.net/2015/06/25/real-](https://code.flickr.net/2015/06/25/real-time-resizing-of-flickr-images-using-gpus/)

[time-resizing-of-flickr-images-using-gpus/](https://code.flickr.net/2015/06/25/real-time-resizing-of-flickr-images-using-gpus/), 2015. 1

- [4] Ilya Loshchilov and Frank Hutter. Decoupled weight decay regularization. In *ICLR*, 2019. 1
- [5] Maxime Oquab, Timothée Darcet, Théo Moutakanni, Huy Vo, Marc Szafraniec, Vasil Khalidov, Pierre Fernandez, Daniel Haziza, Francisco Massa, Alaaeldin El-Nouby, et al. DINOv2: Learning robust visual features without supervision. *TMLR*, 2024. 1
- [6] Alec Radford, Jong Wook Kim, Chris Hallacy, Aditya Ramesh, Gabriel Goh, Sandhini Agarwal, Girish Sastry, Amanda Askell, Pamela Mishkin, Jack Clark, et al. Learning transferable visual models from natural language supervision. In *ICML*, 2021. 1
- [7] Xiaohua Zhai, Basil Mustafa, Alexander Kolesnikov, and Lucas Beyer. Sigmoid loss for language image pre-training. In *ICCV*, 2023. 1

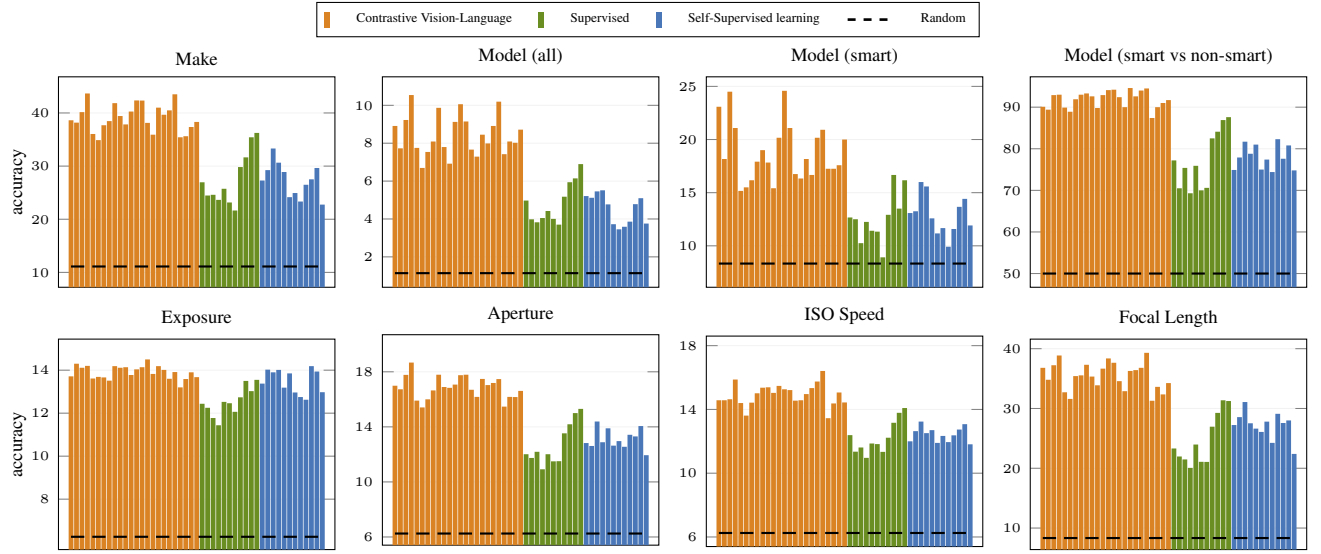

Figure E. **Image acquisition-based label prediction on FlickrExif without masking.** Classification accuracy using a linear classifier. Ordering is according to Tab. C.

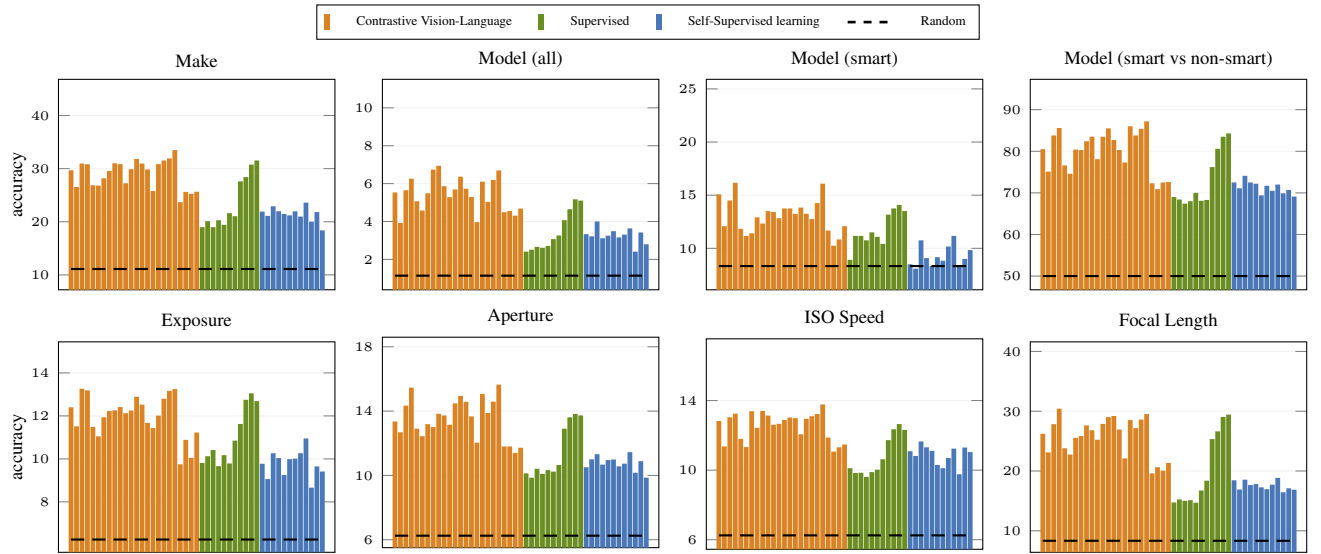

Figure F. **Image acquisition-based label prediction on FlickrExif with a 75% masking ratio.** Classification accuracy using a linear classifier. Ordering is according to Tab. C.

Table C. List of all visual encoders used with their characteristics.

| id | model    | variant      | arch        | class | dim  | resolution | params (M) | train dataset |
|----|----------|--------------|-------------|-------|------|------------|------------|---------------|
| 1  | CLIP     | ViT-B/16     | Transformer | CVL   | 512  | 224        | 88         | WIT           |
| 2  | CLIP     | ViT-B/32     | Transformer | CVL   | 512  | 224        | 86         | WIT           |
| 3  | CLIP     | ViT-L/14     | Transformer | CVL   | 768  | 224        | 304        | WIT           |
| 4  | CLIP     | ViT-L/14@336 | Transformer | CVL   | 768  | 336        | 304        | WIT           |
| 5  | CLIP     | RN50         | CNN         | CVL   | 1024 | 224        | 38         | WIT           |
| 6  | CLIP     | RN101        | CNN         | CVL   | 512  | 224        | 56         | WIT           |
| 7  | CLIP     | RN50×4       | CNN         | CVL   | 640  | 288        | 87         | WIT           |
| 8  | CLIP     | RN50×16      | CNN         | CVL   | 768  | 384        | 167        | WIT           |
| 9  | CLIP     | RN50×64      | CNN         | CVL   | 1024 | 448        | 420        | WIT           |
| 10 | OpenCLIP | ViT-B/16     | Transformer | CVL   | 512  | 224        | 86         | LAION-2B      |
| 11 | OpenCLIP | ViT-B/32     | Transformer | CVL   | 512  | 224        | 87         | LAION-2B      |
| 12 | OpenCLIP | ViT-L/14     | Transformer | CVL   | 768  | 224        | 303        | LAION-2B      |
| 13 | OpenCLIP | ViT-H/14     | Transformer | CVL   | 1024 | 224        | 632        | LAION-2B      |
| 14 | OpenCLIP | ViT-g/14     | Transformer | CVL   | 1024 | 224        | 1012       | LAION-2B      |
| 15 | OpenCLIP | ViT-B/16     | Transformer | CVL   | 512  | 224        | 86         | DataComp-1B   |
| 16 | OpenCLIP | ViT-B/32     | Transformer | CVL   | 512  | 256        | 87         | DataComp-1B   |
| 17 | OpenCLIP | ViT-L/14     | Transformer | CVL   | 768  | 224        | 303        | DataComp-1B   |
| 18 | OpenCLIP | ConvNeXt-B   | CNN         | CVL   | 640  | 256        | 88         | LAION-2B      |
| 19 | OpenCLIP | ConvNeXt-L   | CNN         | CVL   | 768  | 320        | 199        | LAION-2B      |
| 20 | OpenCLIP | ConvNeXt-XXL | CNN         | CVL   | 1024 | 256        | 846        | LAION-2B      |
| 21 | SigLIP   | ViT-B/16     | Transformer | CVL   | 768  | 256        | 93         | WebLI         |
| 22 | SigLIP   | ViT-L/16     | Transformer | CVL   | 1024 | 256        | 316        | WebLI         |
| 23 | SigLIP2  | ViT-B/16     | Transformer | CVL   | 768  | 256        | 93         | WebLI         |
| 24 | SigLIP2  | ViT-L/16     | Transformer | CVL   | 1024 | 256        | 316        | WebLI         |
| 25 | ViT      | ViT-B/16     | Transformer | SUP   | 768  | 224        | 86         | ImageNet-21k  |
| 26 | ViT      | ViT-B/32     | Transformer | SUP   | 768  | 224        | 86         | ImageNet-21k  |
| 27 | ViT      | ViT-L/16     | Transformer | SUP   | 1024 | 224        | 307        | ImageNet-21k  |
| 28 | ViT      | ViT-L/32     | Transformer | SUP   | 1024 | 224        | 307        | ImageNet-21k  |
| 29 | ViT      | ViT-H/14     | Transformer | SUP   | 1280 | 224        | 632        | ImageNet-21k  |
| 30 | ResNet   | RN50         | CNN         | SUP   | 2048 | 224        | 26         | ImageNet-1k   |
| 31 | ResNet   | RN101        | CNN         | SUP   | 2048 | 224        | 45         | ImageNet-1k   |
| 32 | ConvNeXt | ConvNeXt-T   | CNN         | SUP   | 768  | 384        | 50         | ImageNet-21k  |
| 33 | ConvNeXt | ConvNeXt-B   | CNN         | SUP   | 1024 | 384        | 89         | ImageNet-21k  |
| 34 | ConvNeXt | ConvNeXt-L   | CNN         | SUP   | 1536 | 384        | 198        | ImageNet-21k  |
| 35 | ConvNeXt | ConvNeXt-XL  | CNN         | SUP   | 2048 | 384        | 350        | ImageNet-21k  |
| 36 | DINO     | ViT-S/16     | Transformer | SSL   | 384  | 224        | 21         | ImageNet-1k   |
| 37 | DINO     | ViT-S/8      | Transformer | SSL   | 384  | 224        | 21         | ImageNet-1k   |
| 38 | DINO     | ViT-B/16     | Transformer | SSL   | 768  | 224        | 85         | ImageNet-1k   |
| 39 | DINO     | ViT-B/8      | Transformer | SSL   | 768  | 224        | 85         | ImageNet-1k   |
| 40 | DINO     | RN50         | CNN         | SSL   | 2048 | 224        | 23         | ImageNet-1k   |
| 41 | DINOv2   | ViT-S/14 reg | Transformer | SSL   | 384  | 224        | 21         | LVD-142M      |
| 42 | DINOv2   | ViT-B/14 reg | Transformer | SSL   | 768  | 224        | 86         | LVD-142M      |
| 43 | DINOv2   | ViT-L/14 reg | Transformer | SSL   | 1024 | 224        | 300        | LVD-142M      |
| 44 | DINOv2   | ViT-g/14 reg | Transformer | SSL   | 1536 | 224        | 1100       | LVD-142M      |
| 45 | MoCo v3  | ViT-S        | Transformer | SSL   | 384  | 224        | 22         | ImageNet-1k   |
| 46 | MoCo v3  | ViT-B        | Transformer | SSL   | 768  | 224        | 86         | ImageNet-1k   |
| 47 | MoCo v3  | RN50         | CNN         | SSL   | 2048 | 224        | 26         | ImageNet-1k   |
